# Supplementary material
Source: publisher site journal article supplement (https://www.dovepress.com/article/supplementary_file/617875/617875_Revised%20Supplementary%20Material.docx)
Supplement: Supplementary file 1 [file 617875_Revised%20Supplementary%20Material.docx]

**Supplementary Methods**

**1. Detailed MRI Acquisition Parameters**

All MRI examinations were performed on a 3.0T GE Signa scanner equipped with an eight-channel phased-array body coil. Patients were positioned in the supine position with head-first entry. The imaging protocols included the following sequences: axial in-phase and out-of-phase T1-weighted imaging (T1WI) with a repetition time (TR)/echo time (TE) of 180/2.2 ms and 180/1.2 ms respectively, a slice thickness of 5 mm, an inter-slice gap of 1 mm, a field of view (FOV) of 38×38 cm, and a matrix size of 256×192; axial T2-weighted imaging (T2WI) with a TR/TE of 4000/85 ms, a slice thickness of 5 mm, an inter-slice gap of 1 mm, an FOV of 38×38 cm, and a matrix size of 320×224; and dynamic contrast-enhanced 3D liver acquisition with volume acceleration (LAVA) imaging with a TR/TE of 4.5/1.8 ms, a slice thickness of 3 mm, no inter-slice gap, an FOV of 42×42 cm, and a matrix size of 256×192. For dynamic contrast-enhanced imaging, gadopentetate dimeglumine (Gd-DTPA) was intravenously administered at a dose of 0.1 mmol/kg at an injection rate of 2.0 mL/s, followed by a 20 mL saline flush. The arterial, portal venous, and delayed phases were acquired at 20–25 s, 55–65 s, and 120–160 s after contrast agent injection, respectively.

**2. Image Preprocessing Details**

Prior to tumor segmentation, portal venous phase images underwent standardized preprocessing. First, voxel size was resampled to 1×1×1 mm via linear interpolation using ITK-SNAP software. Subsequently, gray-level normalization and discretization into 32 bins were performed to improve the robustness of radiomic features.

**3. Radiomics Feature Extraction and Selection**

Radiomic feature extraction was conducted using PyRadiomics (version 3.0). A total of 108 features were extracted from both original images and derived images (including wavelet-transformed and Laplacian of Gaussian-filtered images), covering the following categories: 18 first-order statistics features, 14 shape-based features, and 75 second-order statistics features (24 gray level co-occurrence matrix features, 16 gray level run length matrix features, 16 gray level size zone matrix features, 14 gray level dependence matrix features, and 5 neighborhood gray tone difference matrix features).

Following Z-score normalization, feature selection was performed in a stepwise manner. First, univariate t-test was applied, and 47 features with P < 0.05 were retained. Next, Spearman correlation analysis was conducted to remove redundant features, eliminating 11 features with a correlation coefficient ≥ 0.90. Finally, least absolute shrinkage and selection operator (LASSO) regression with 10-fold cross-validation (using lambda.min as the selection criterion) was applied, and 4 features with non-zero coefficients were selected to construct the radiomics score (Rad-score).

**4. Intra- and Inter-observer Reproducibility**

To evaluate the reproducibility of tumor segmentation, intra-observer and inter-observer agreement were assessed using intraclass correlation coefficients (ICCs). For intra-observer reproducibility, one radiologist randomly selected 20 patients and re-segmented the regions of interest (ROIs) two weeks after the initial segmentation. For inter-observer reproducibility, another independent radiologist performed segmentation on 20 different patients. All ICC values exceeded 0.80, indicating excellent agreement for the extracted radiomic features.

**5. Machine Learning Algorithms Comparison**

Six machine learning algorithms were comparatively evaluated for radiomics model construction, including logistic regression (LR), support vector machine (SVM), K-nearest neighbors (KNN), extremely randomized trees (ExtraTrees), light gradient boosting machine (LightGBM), and multilayer perceptron (MLP). Hyperparameter tuning was performed via grid search with 5-fold cross-validation in the training cohort. The performance metrics of each algorithm are presented in Supplementary Table 1, and the results of DeLong tests for pairwise model comparisons are summarized in Supplementary Table 2. The KNN algorithm was ultimately selected for final Rad-score construction, as it achieved the highest validation AUC (0.774) and exhibited the smallest performance decay between the training and validation cohorts.

**6. Additional Statistical Details**

Model calibration was evaluated using the Hosmer-Lemeshow goodness-of-fit test, with P > 0.05 considered indicative of good calibration for both the training and validation cohorts. Decision curve analysis was implemented using the rmda package in R software. Kaplan-Meier survival curves were compared using the log-rank test. All statistical tests were two-sided.

**Supplementary Table 1.** Performance of six machine learning models in training and validation cohorts.

|  | **model_name** | **Accuracy** | **AUC** | **95% CI** | **Sensitivity** | **Specificity** | **Recall** | **F1** | **Task** |
| --- | --- | --- | --- | --- | --- | --- | --- | --- | --- |
| **1** | LR | 0.711 | 0.661 | 0.5674 - 0.7542 | 0.876 | 0.404 | 0.876 | 0.798 | label-train |
| **2** | LR | 0.622 | 0.724 | 0.5548 - 0.8939 | 0.458 | 0.923 | 0.458 | 0.611 | label-validation |
| **3** | SVM | 0.758 | 0.754 | 0.6648 - 0.8431 | 0.784 | 0.712 | 0.784 | 0.809 | label-train |
| **4** | SVM | 0.622 | 0.657 | 0.4651 - 0.8490 | 0.542 | 0.769 | 0.542 | 0.65 | label-validation |
| **5** | KNN | 0.705 | 0.826 | 0.7611 - 0.8911 | 0.629 | 0.846 | 0.629 | 0.735 | label-train |
| **6** | KNN | 0.703 | 0.774 | 0.6245 - 0.9236 | 0.625 | 0.846 | 0.625 | 0.732 | label-validation |
| **7** | ExtraTrees | 0.691 | 0.772 | 0.6925 - 0.8508 | 0.629 | 0.808 | 0.629 | 0.726 | label-train |
| **8** | ExtraTrees | 0.649 | 0.715 | 0.5396 - 0.8899 | 0.5 | 0.923 | 0.5 | 0.649 | label-validation |
| **9** | LightGBM | 0.758 | 0.789 | 0.7107 - 0.8664 | 0.804 | 0.673 | 0.804 | 0.812 | label-train |
| **10** | LightGBM | 0.595 | 0.603 | 0.4117 - 0.7935 | 0.542 | 0.692 | 0.542 | 0.634 | label-validation |
| **11** | MLP | 0.671 | 0.693 | 0.6034 - 0.7824 | 0.649 | 0.712 | 0.649 | 0.72 | label-train |
| **12** | MLP | 0.757 | 0.654 | 0.4613 - 0.8464 | 1 | 0.308 | 1 | 0.842 | label-validation |

LR, logistic regression; SVM, support vector machine; KNN, K-nearest neighbors; ExtraTrees, extremely randomized trees; LightGBM, light gradient boosting machine; MLP, multilayer perceptron; AUC, area under the receiver operating characteristic curve; CI, confidence interval.

**Supplementary Table 2.** DeLong test P‑values comparing AUCs between models in validation cohort.

| Comparison | P value |
| --- | --- |
| KNN vs. LR | 0.042 |
| KNN vs. SVM | 0.038 |
| KNN vs. ExtraTrees | 0.011 |
| KNN vs. LightGBM | 0.027 |
| KNN vs. MLP | 0.009 |

Pairwise comparisons of AUC values between all models were performed using the DeLong test in the validation cohort. A two-sided *P* value < 0.05 was considered to indicate a statistically significant difference. AUC, area under the receiver operating characteristic curve; LR, logistic regression; SVM, support vector machine; KNN, K-nearest neighbors; ExtraTrees, extremely randomized trees; LightGBM, light gradient boosting machine; MLP, multilayer perceptron.
